# Supplementary material for: The Puzzle of the Walnut Shell: A Novel Cell Type with Interlocked Packing
Source: PubMed Central journal article supplement (PMC6702760; doi:10.1002/advs.201900644), 2019-06-11
Supplement: ADVS-6-1900644-s002.pdf [file ADVS-6-1900644-s002.pdf]

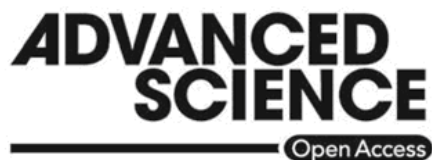

## Supporting Information

for *Adv. Sci.*, DOI: 10.1002/advs.201900644

**The Puzzle of the Walnut Shell: A Novel Cell Type  
with Interlocked Packing**

*Sebastian J. Antreich, Nannan Xiao, Jessica C. Huss, Nils  
Horbelt, Michaela Eder, Richard Weinkamer, and Notburga  
Gierlinger\**

## Supporting Information

**The puzzle of the walnut shell: a novel cell type with interlocked packing**

*Sebastian J. Antreich, Nannan Xiao, Jessica C. Huss, Nils Horbelt, Michaela Eder, Richard Weinkamer, and Notburga Gierlinger\**

Correspondence to: [burgi.gierlinger@boku.ac.at](mailto:burgi.gierlinger@boku.ac.at)

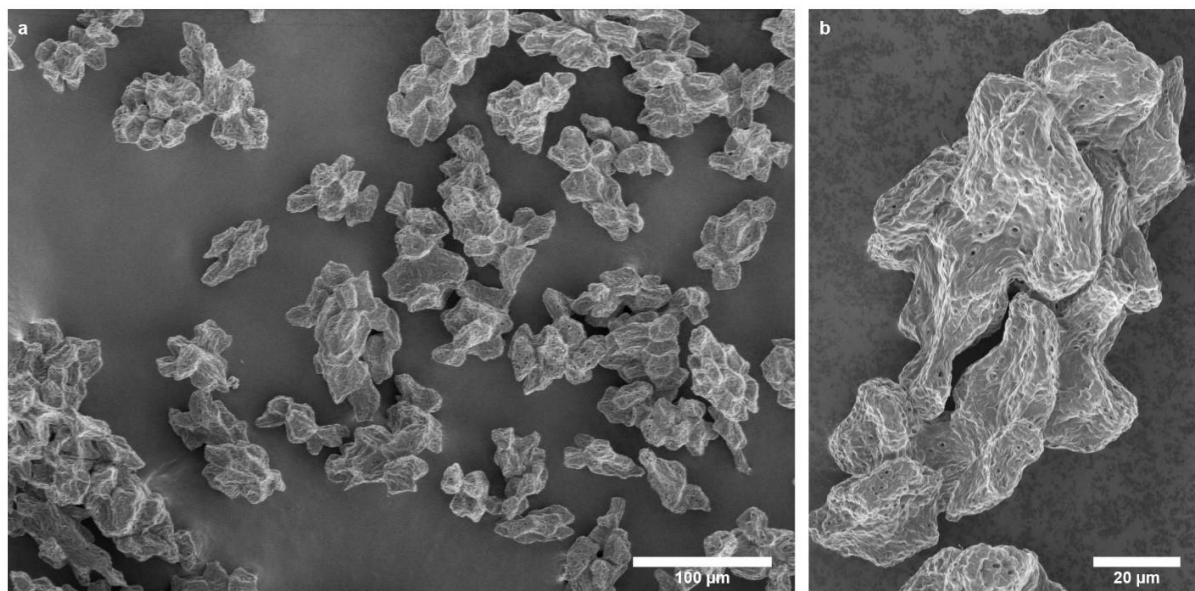

**Figure S1. Scanning electron microscopy (SEM) of macerated walnut cells.** (a) Diversity of polylobed single cells of a walnut shell (October) after treating with H<sub>2</sub>O<sub>2</sub> and acetic acid (b) a close-up of two interlocked cells.

**Movie S1.** (*online*) Confocal laser scanning microscope (CLSM) depth scan through two single cells, chemically isolated from the walnut shell and treated with Calcofluor white to stain cellulose.

**Movie S2.** (*online*) Arrangement of several cells in the walnut tissue after CT-reconstruction. The yellow cell is the initial cell and all its 14 neighboring cells appear successively, which illustrates the 3D-jigsaw morphology and the interlocking of the cells.
